# Supplementary material for: Standardizing workflows in imaging transcriptomics with the abagen toolbox
Source: eLife journal article supplement (doi:10.7554/elife.72129), 2021-11-16
Supplement: supp [file elife-72129-supp-v1.zip]

Archive with 2 entries (2 files):
- elife_poa_e72129_Transparent_Reporting_File.pdf
- elife_poa_e72129_Supplementary_file_1.pdf
