# Supplementary material for: Standardizing workflows in imaging transcriptomics with the abagen toolbox
Source: eLife journal article supplement (doi:10.7554/elife.72129), 2021-11-16
Supplement: supp [file elife-72129-supp-v1.zip › elife_poa_e72129_Supplementary_file_1.pdf]

Table S1. **Default abagen pipeline options** | The default settings for the 17 processing steps considered when processing the AHBA data with abagen. An entry of "—" indicates that this is a required, user-supplied parameter. A blank entry indicates that the processing step is not implemented by default. Refer to Table ?? and *Methods: Gene expression pipelines* for further details.

| <i>Option</i>                        | <i>Default</i>         |
|--------------------------------------|------------------------|
| Volumetric or surface atlas          | —                      |
| Individualized or group atlas        | —                      |
| Use non-linear MNI coordinates       | True                   |
| Mirror samples across L/R hemisphere |                        |
| Update probe-to-gene annotations     | True                   |
| Intensity-based filtering threshold  | 50%                    |
| Inter-areal similarity threshold     |                        |
| Probe selection method               | differential stability |
| Donor-specific probe selection       | aggregate              |
| Missing data method                  |                        |
| Sample-to-region matching tolerance  | 2mm                    |
| Sample normalization method          | scaled robust sigmoid  |
| Gene normalization method            | scaled robust sigmoid  |
| Normalize only matched samples       | True                   |
| Normalizing discrete structures      | False                  |
| Sample-to-region combination method  | donors                 |
| Sample-to-region combination metric  | mean                   |
